# Supplementary material
Source: PubMed Central journal article supplement (PMC3696424)
Supplement: NIHMS477615-supplement-216_2013_6981_MOESM1_ESM.pdf [file NIHMS477615-supplement-216_2013_6981_MOESM1_ESM.pdf]

# **Analytical and Bioanalytical Chemistry**

## **Electronic Supplementary Material**

**Use of entrapment and high-performance affinity chromatography to compare the binding of drugs and site-specific probes with normal and glycosylated human serum albumin**

**Abby J. Jackson, Jeanethe Anguizola, Erika L. Pfaunmiller, and David S. Hage**

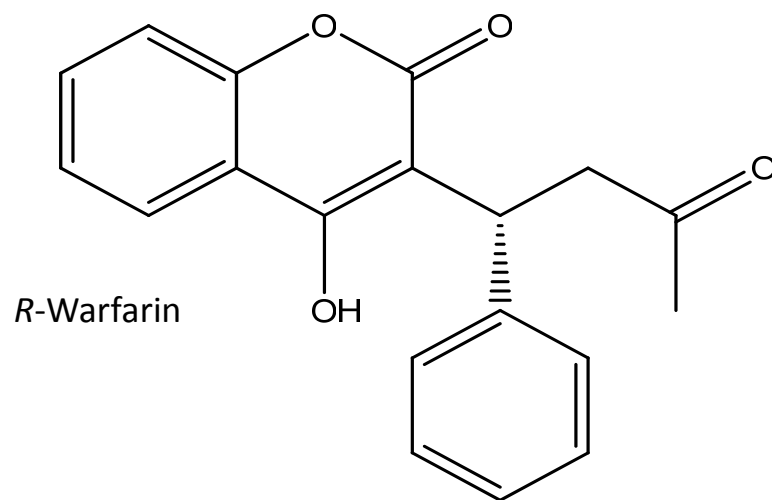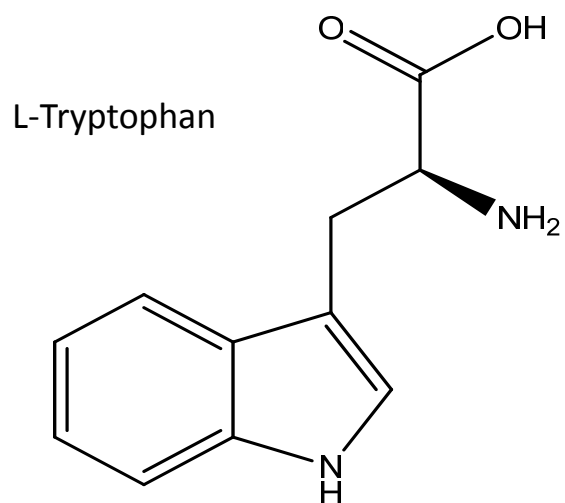

**Figure S1.** Structures of *R*-warfarin and L-tryptophan
